# Supplementary material
Source: PubMed Central journal article supplement (PMC6800199)

Supplemental Figures 1a-e

*Forest plots for each stage of the meta-analysis*

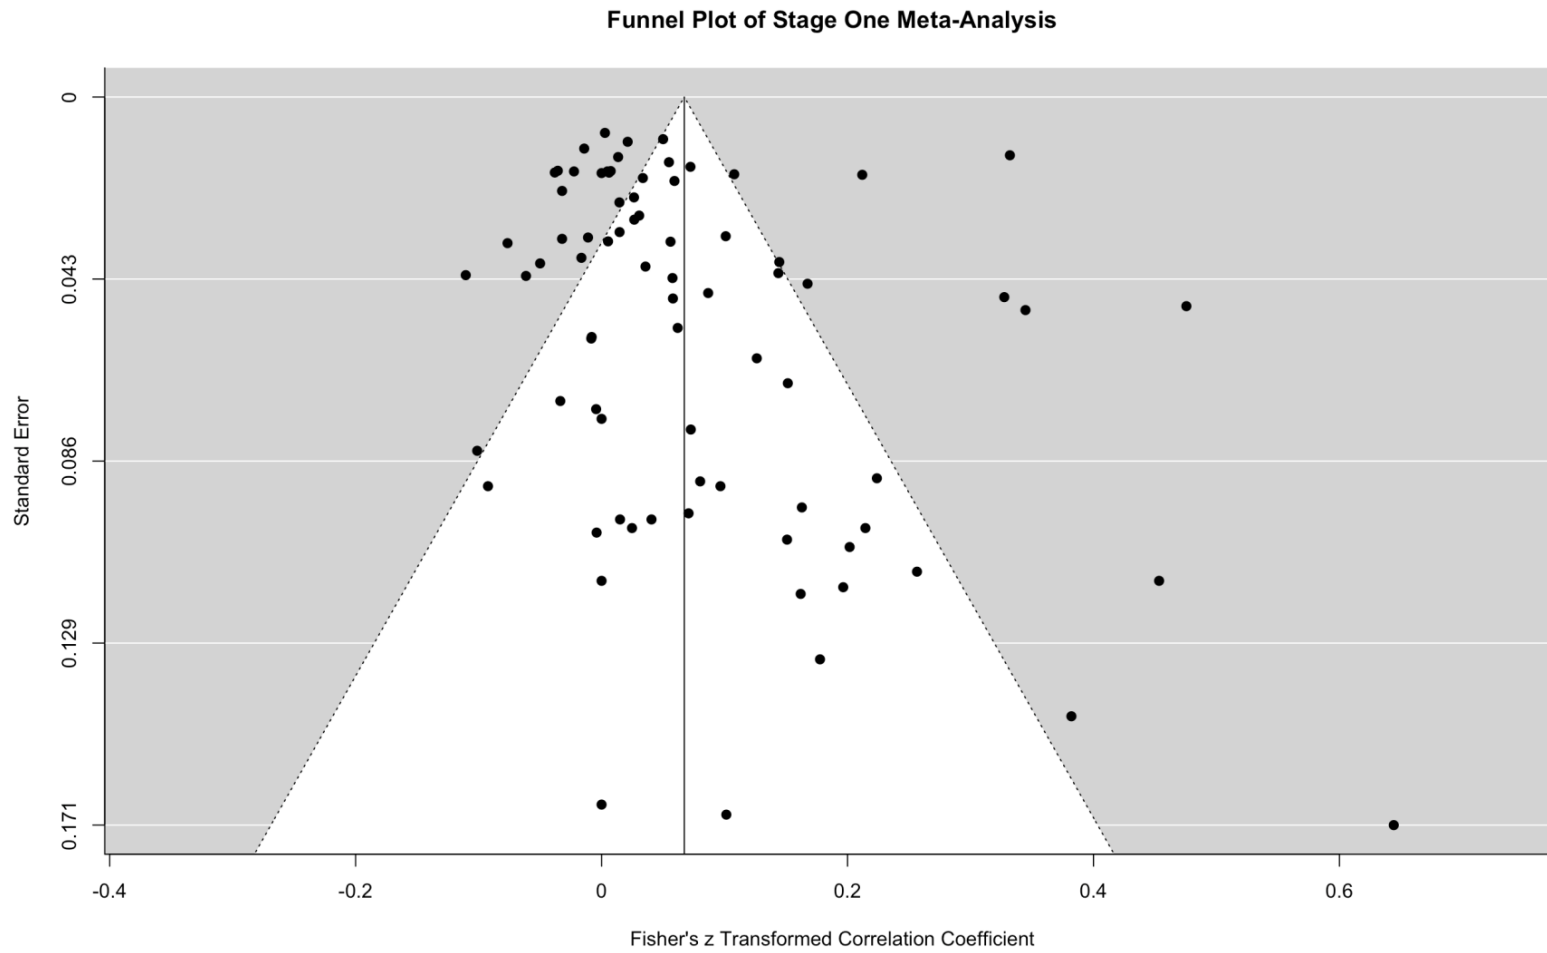

Funnel Plot of Stage Two Meta-Analysis

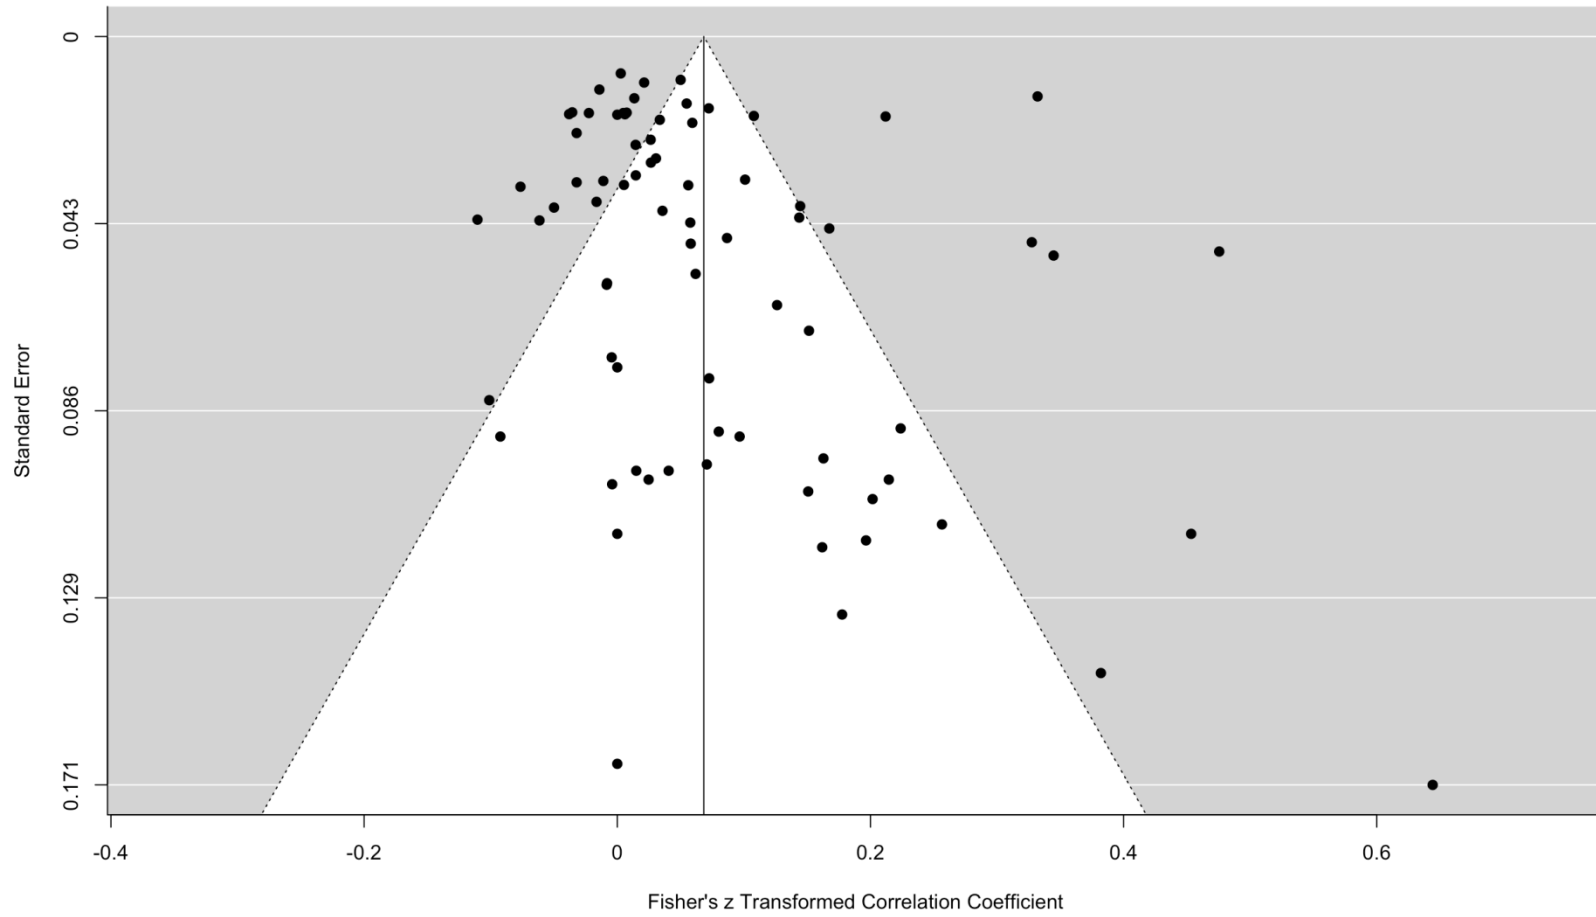

Funnel Plot of Stage Three Meta-Analysis

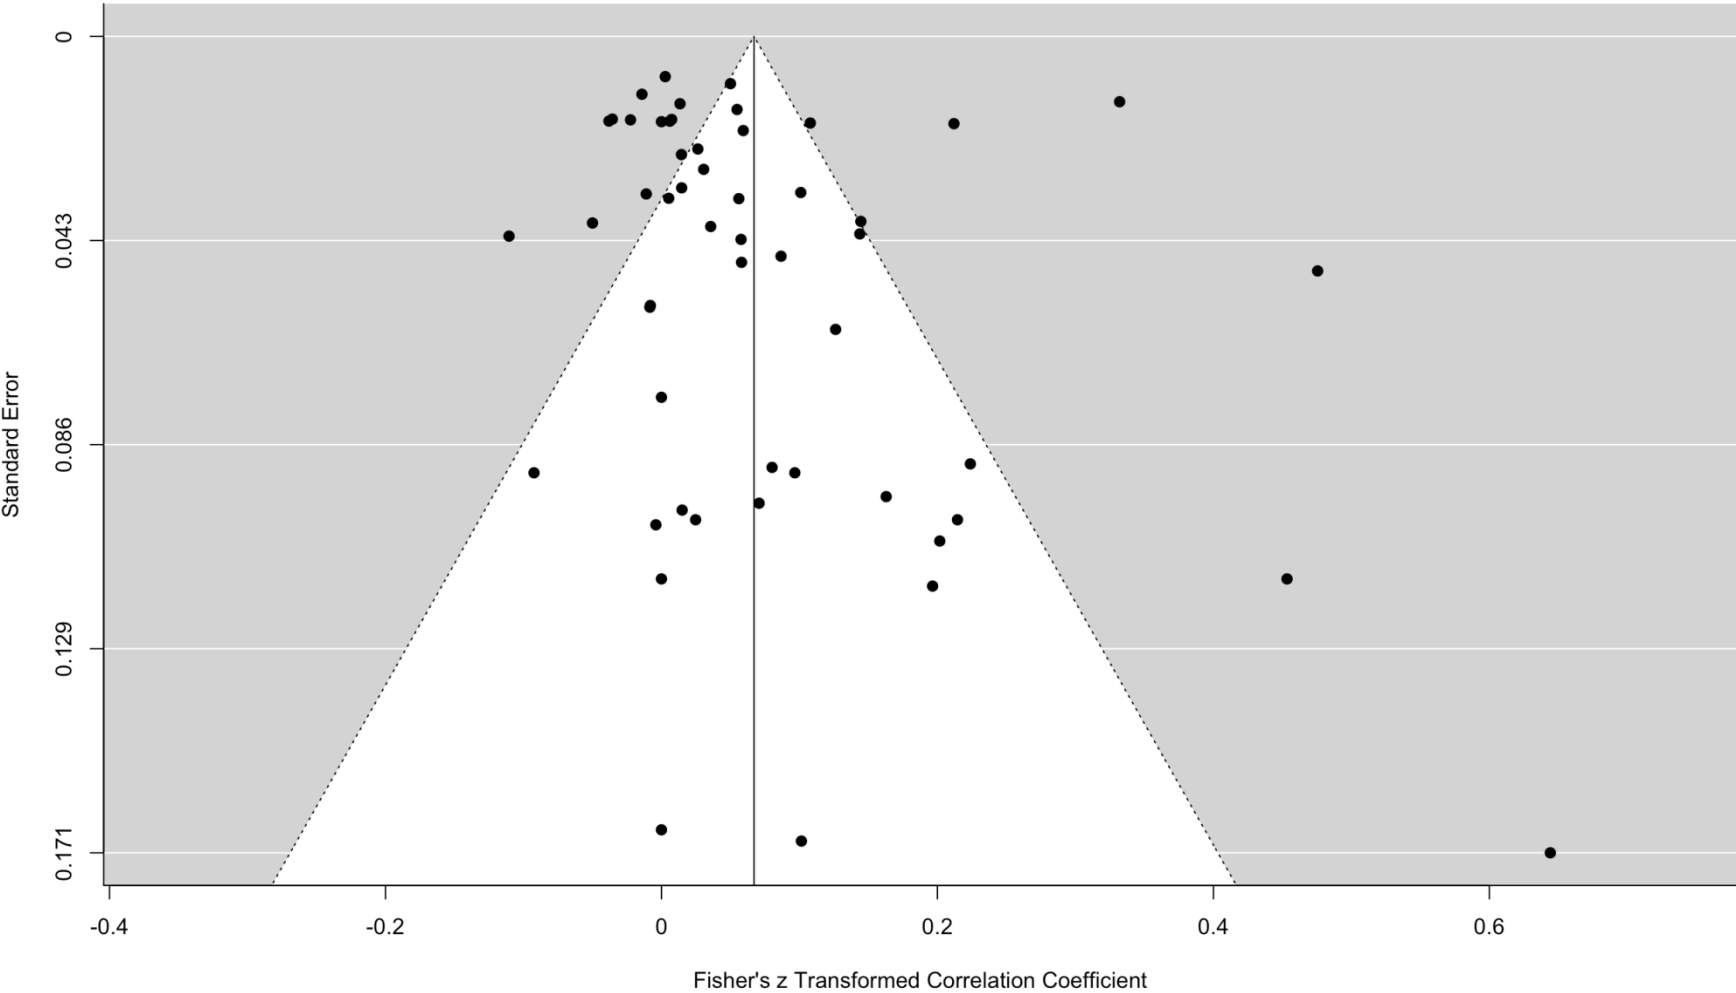

Funnel Plot of Stage Four Meta-Analysis

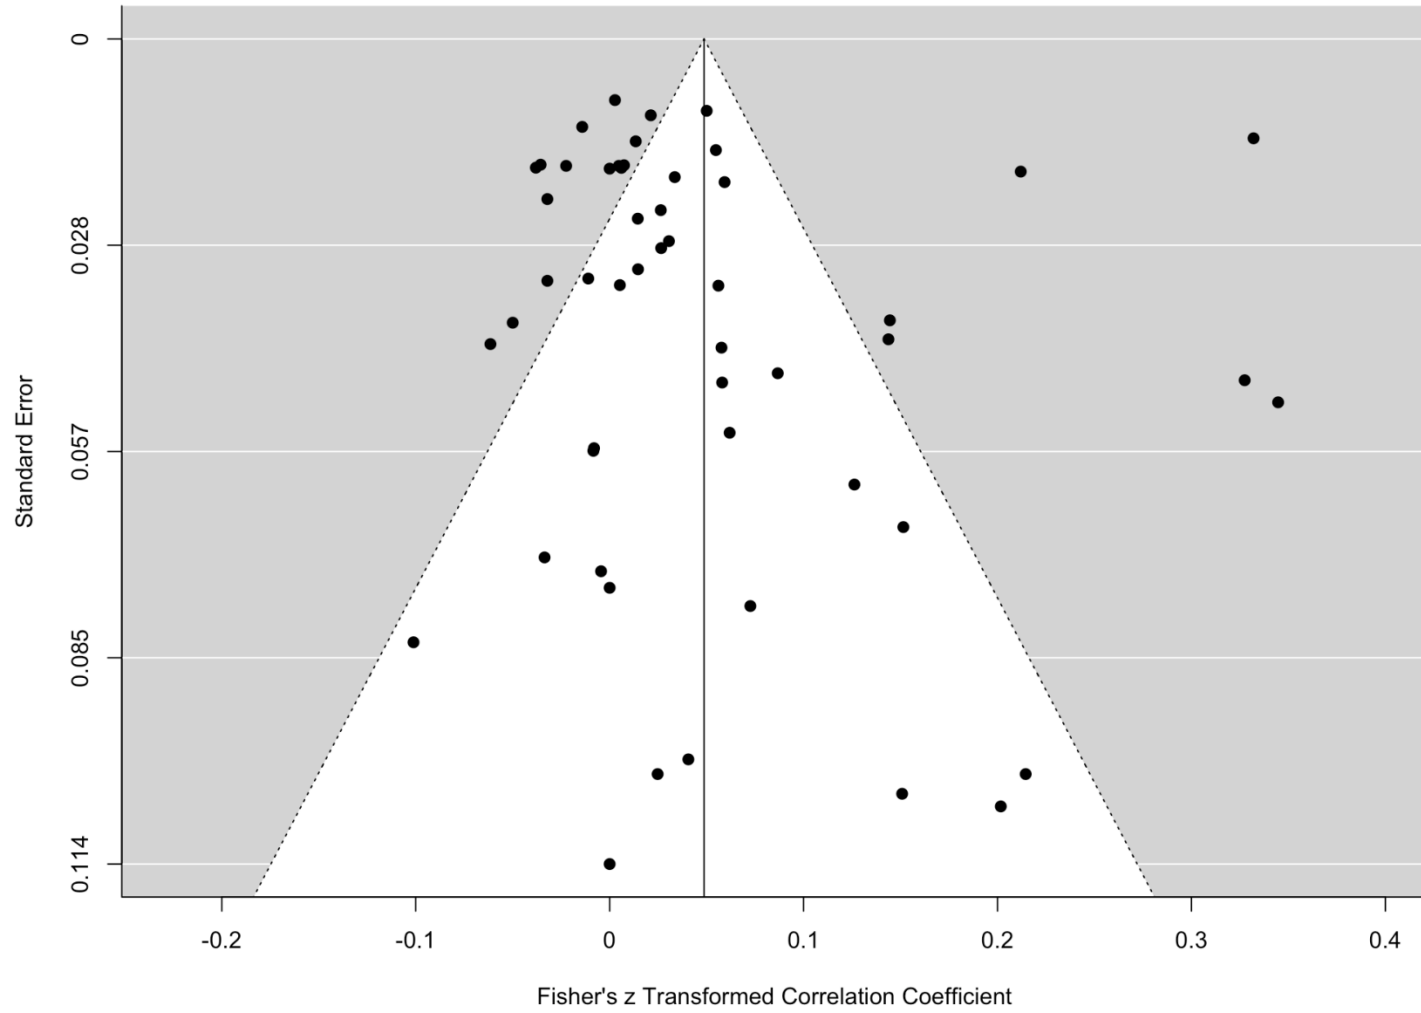

Funnel Plot of Stage Five Meta-Analysis

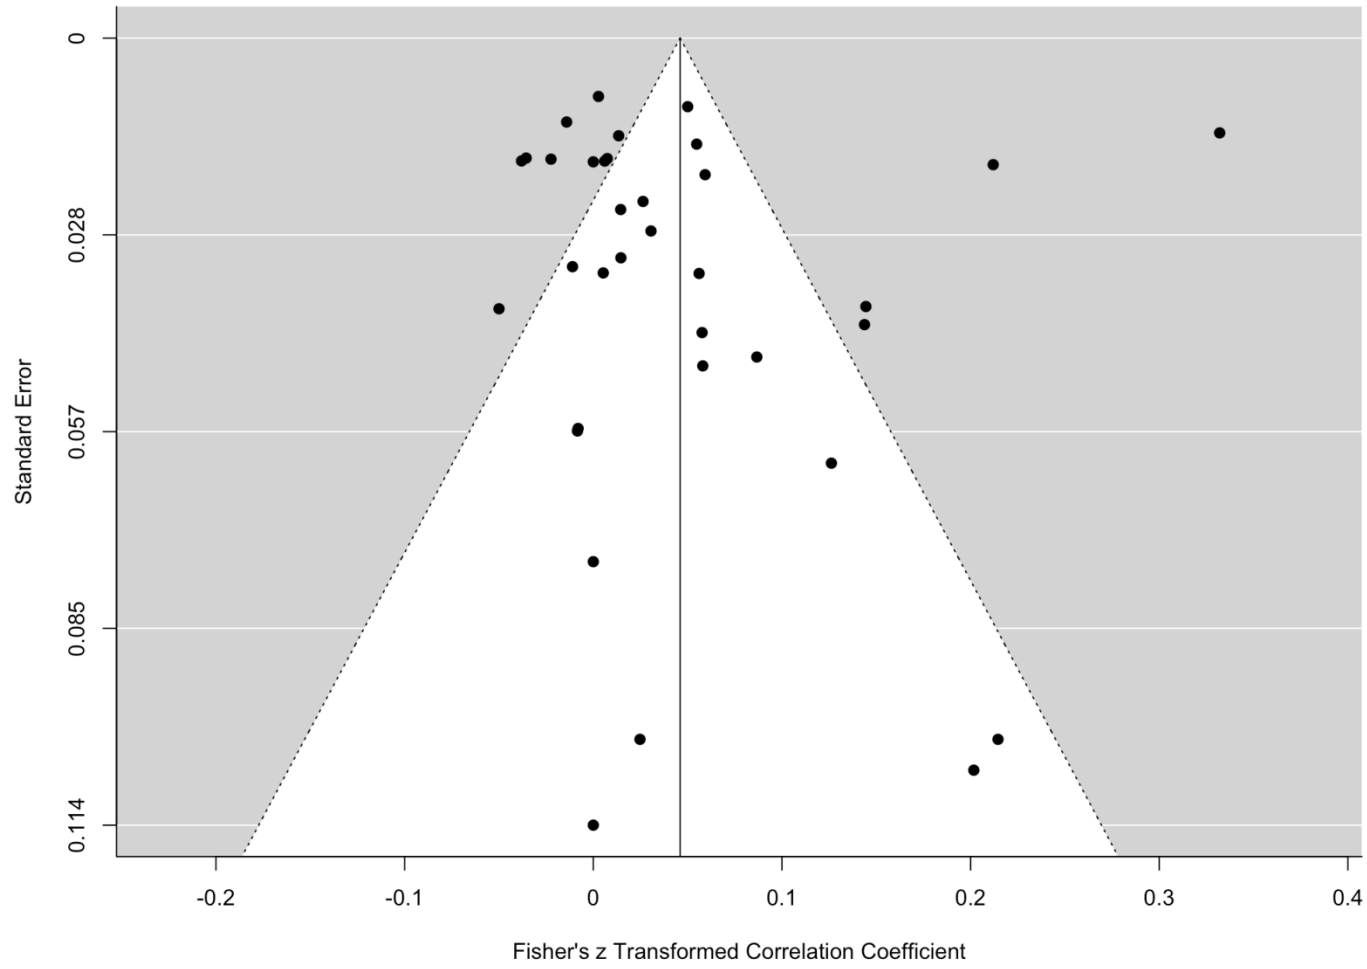

Supplement: NIHMS1043795-supplement-Suppl_Figure.pdf [file NIHMS1043795-supplement-Suppl_Figure.pdf]
